# Supplementary material for: Vinylimidazole coordination modes to Pt and Au metal centers
Source: Royal Society of Chemistry journal article supplement (doi:10.1039/d0nj00845a), 2020-01-01
Supplement: d0nj00845a1.pdf [file d0nj00845a1.pdf]

## Supporting information

### Vinylimidazole coordination modes to Pt and Au metal centers

Sirpa Jääskeläinen, Igor O. Koshevoy, Sari Suvanto, Tiina Ryhänen and Pipsa Hirva  
Department of Chemistry, University of Eastern Finland, P.O. Box 111, Fi-80101 Joensuu,  
Finland

E-mail: sirpa.jaaskelainen@uef.fi

**Figure S1.** Bond paths and bond critical points (BCPs = small light green balls) in the extended model of the crystal structure of **2**.

**Figure S2.**  $^1\text{H}$  nmr spectra for 1-vinylimidazole and the complexes **1** – **4**.

**Figure S3.**  $^{13}\text{C}$  nmr spectra for 1-vinylimidazole

**Table S1.**  $^{13}\text{C}$  nmr spectra for 1-vinylimidazole and the complexes **1** – **4**.

**Figure S4.** Experimental and simulated Raman spectrum of **1** at the region 800-1600  $\text{cm}^{-1}$

**Figure S5.** Experimental and simulated Raman spectrum of **1** at the region 100-600  $\text{cm}^{-1}$

**Figure S6.** Experimental IR spectrum of Vinyl imidazole and complexes **1** – **4**.

**Figure S7.** Simulated IR spectra of vinylimidazole and protonated vinylimidazole.

**Figure S8.** Simulated IR spectra of optimized structures of **1** and **2**.

**Table S2.** Bond length and angle data for **1** - **4**

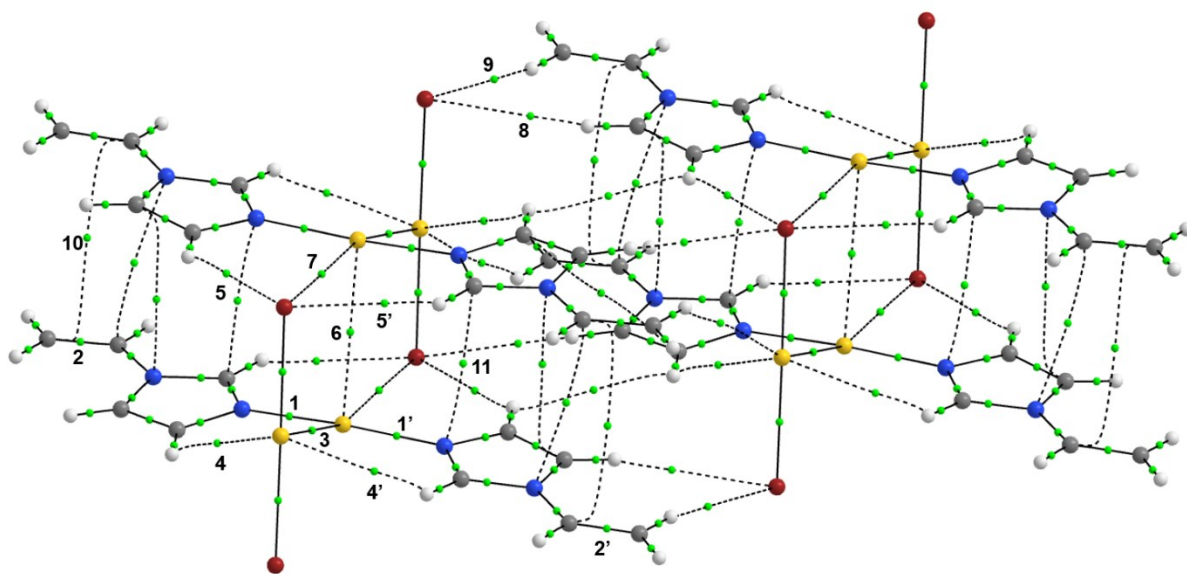

**Figure S1.** Bond paths and bond critical points (BCPs = small light green balls) in the extended model of the crystal structure of **2**. The numbering scheme of the BCPs is followed in Table 1.

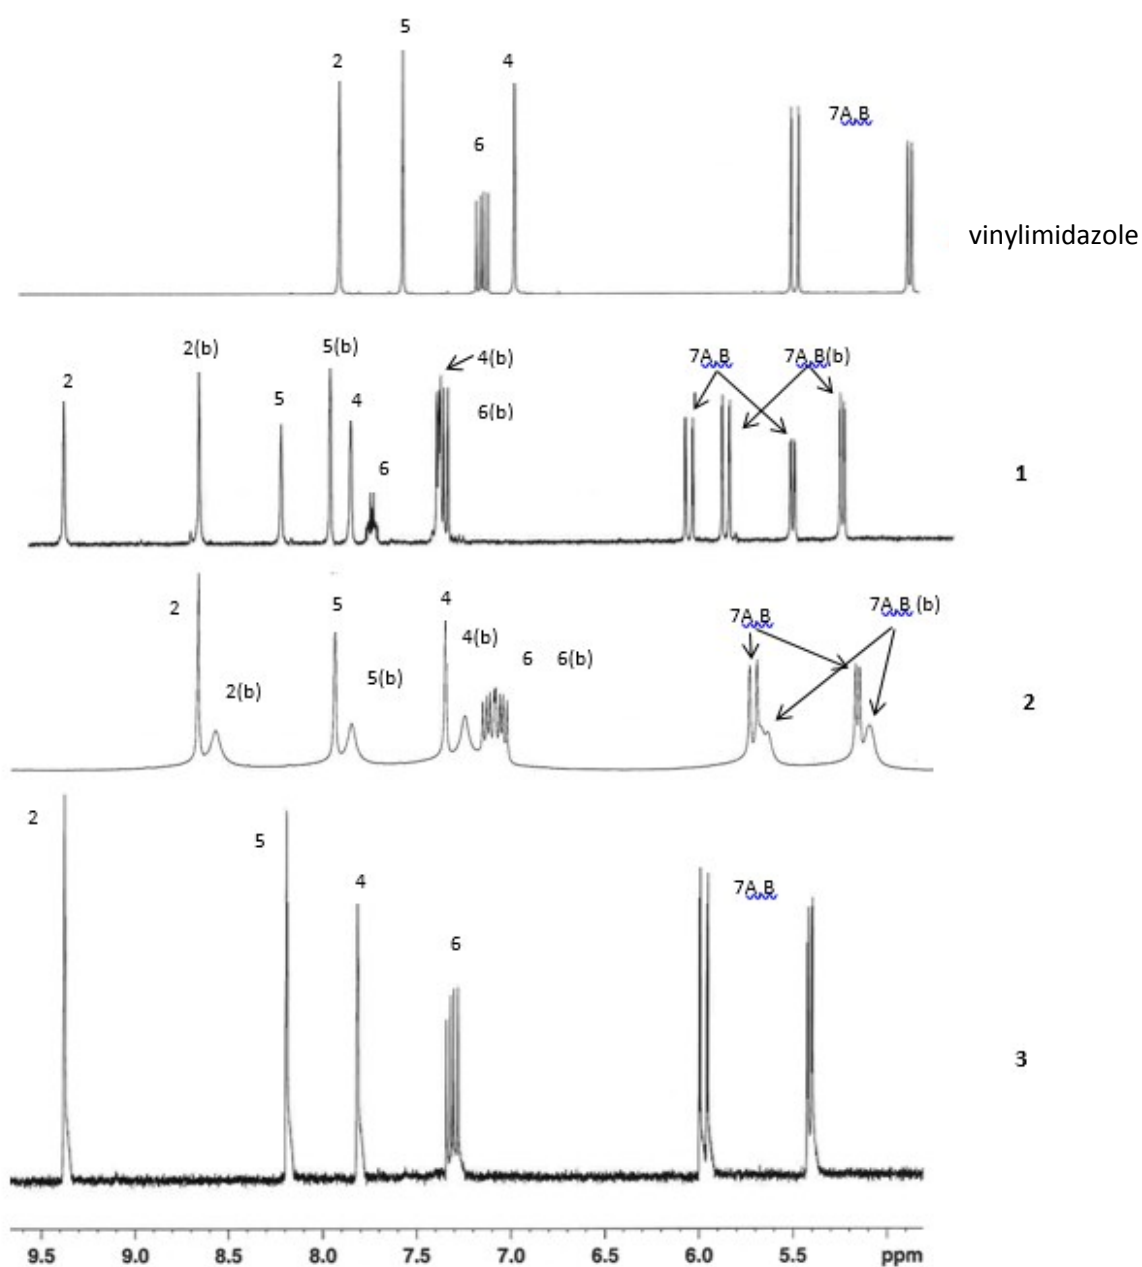

**Figure S2.** The  $^1\text{H}$  nmr spectra of vinylimidazole and compounds 1-3 (the spectrum of 4 is similar with 3) (Small letter b refers to the second isomer/conformer in the solution)

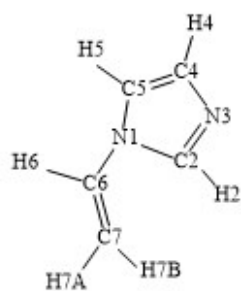

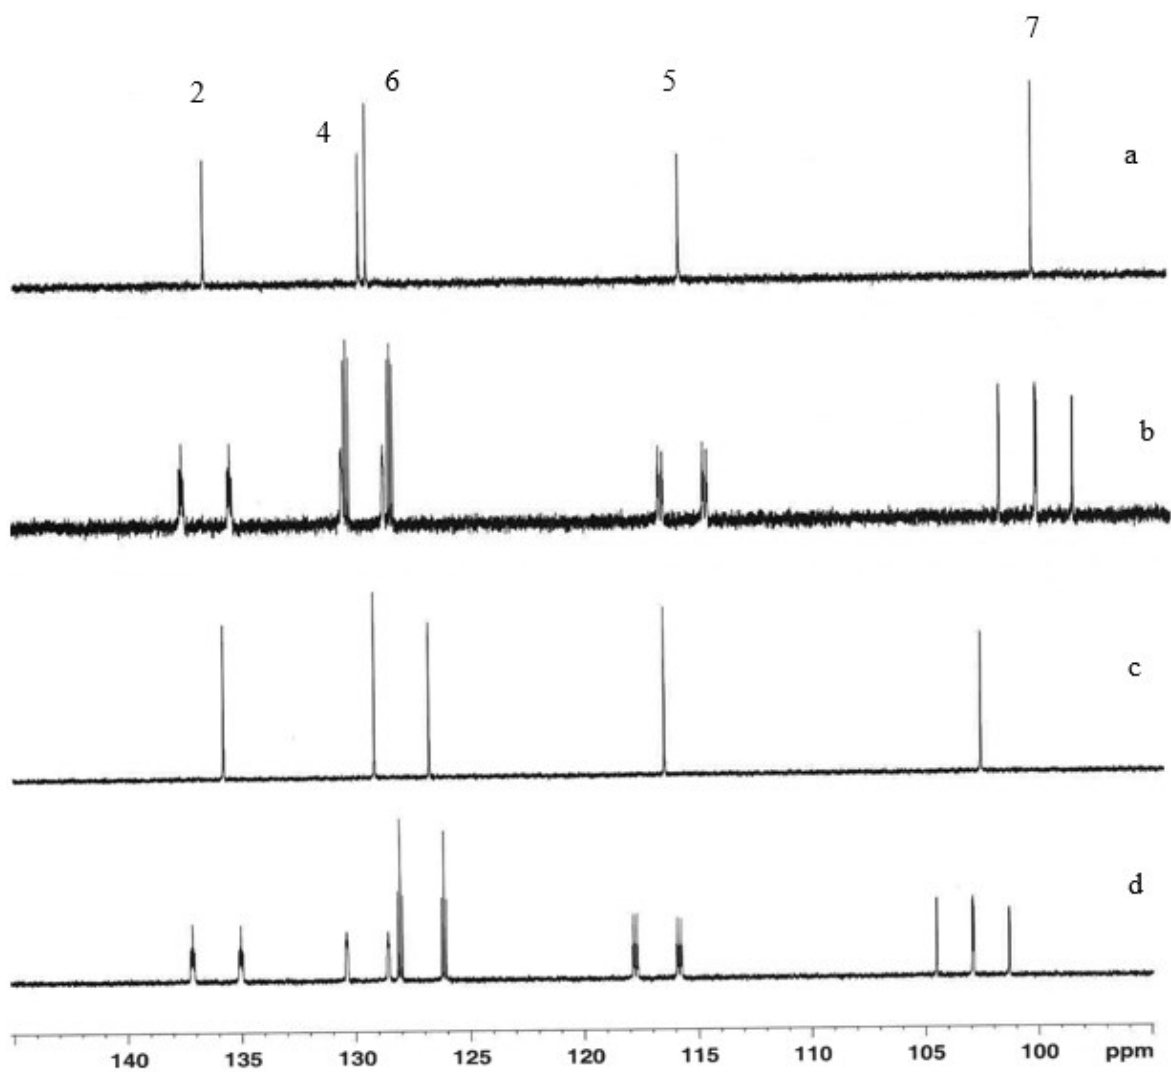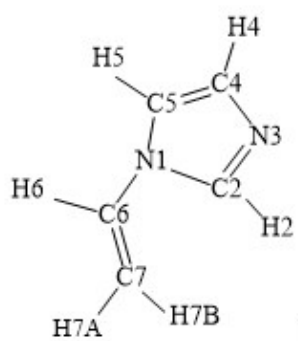

**Figure S3.**  $^{13}\text{C}\{^1\text{H}\}$  and  $^{13}\text{C}$  NMR spectra for vinylimidazole (a,b) and Hvinylimidazole (b,c)

**Table S1.** Experimental ( $d_6$ -DMSO) and calculated<sup>68-70</sup>  $^{13}\text{C}$  spectra for vinylimidazole and compounds **1-4**.

| Carbon<br>Compound                    | <b>2</b> | <b>4</b> | <b>5</b> | <b>6</b> | <b>7</b> |
|---------------------------------------|----------|----------|----------|----------|----------|
| Exp. Vinylimidazole                   | 136.6    | 129.9    | 116.1    | 129.6    | 100.8    |
| Calc. Vinylimidazole <sup>68-70</sup> | 136.2    | 130.2    | 115.8    | 129.5    | 101.4    |
| Exp. Vinylimidazole+HCl               | 136.1    | 129.5    | 116.9    | 127.4    | 102.9    |
| <b>1</b>                              | 138.0    | 128.9    | 118.6    | 120.8    | 108.5    |
| <b>2</b>                              | 139.9    | 130.0    | 118.4    | 129.2    | 106.3    |
| <b>3</b>                              | 134.8    | 128.9    | 118.6    | 120.9    | 108.6    |
| <b>4</b>                              | 134.9    | 128.9    | 118.7    | 120.9    | 108.7    |

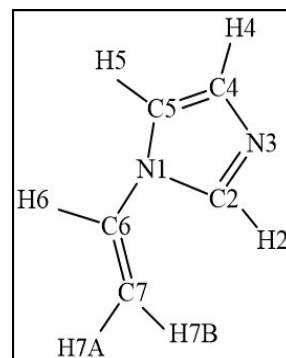

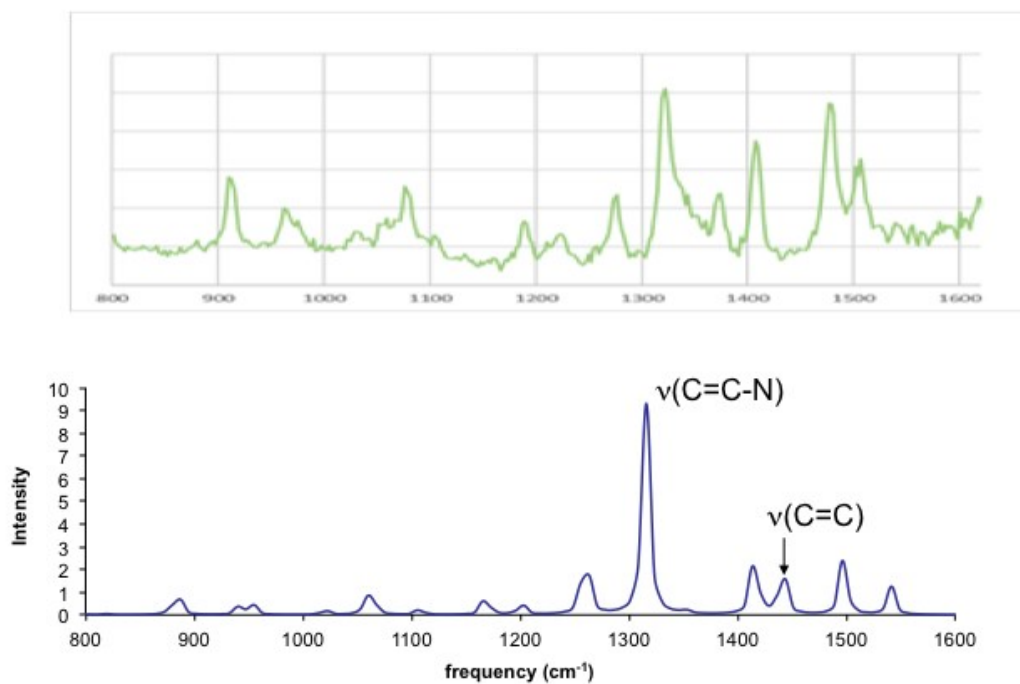

**Figure S4.** Experimental and simulated Raman spectrum of **1** at the region 800-1600  $\text{cm}^{-1}$

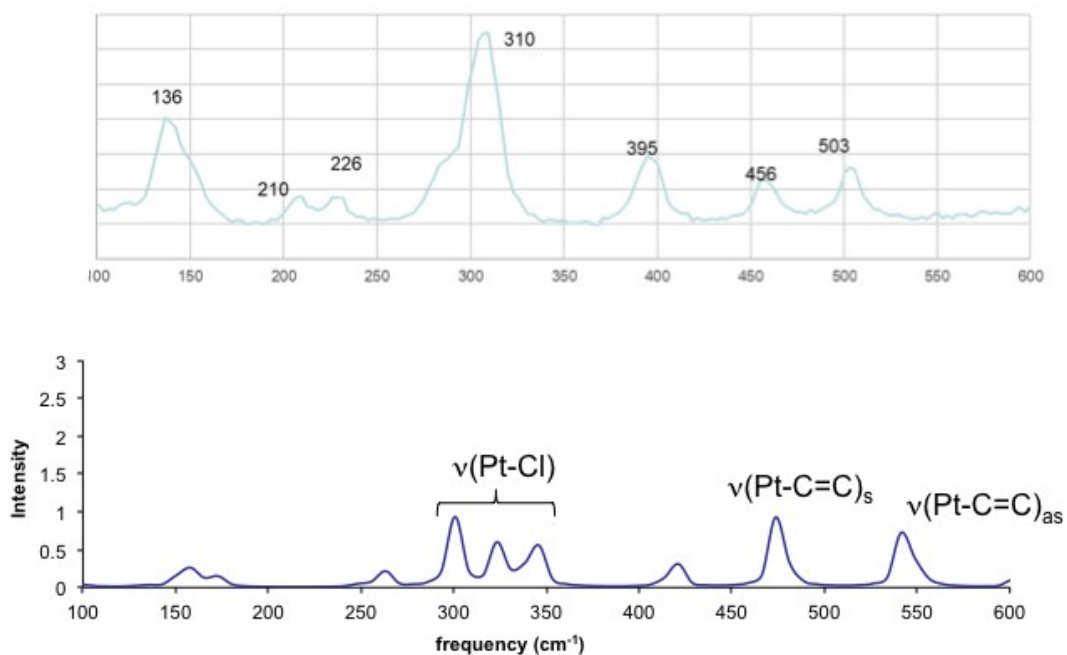

**Figure S5.** Experimental and simulated Raman spectrum of **1** at the region 100-600  $\text{cm}^{-1}$

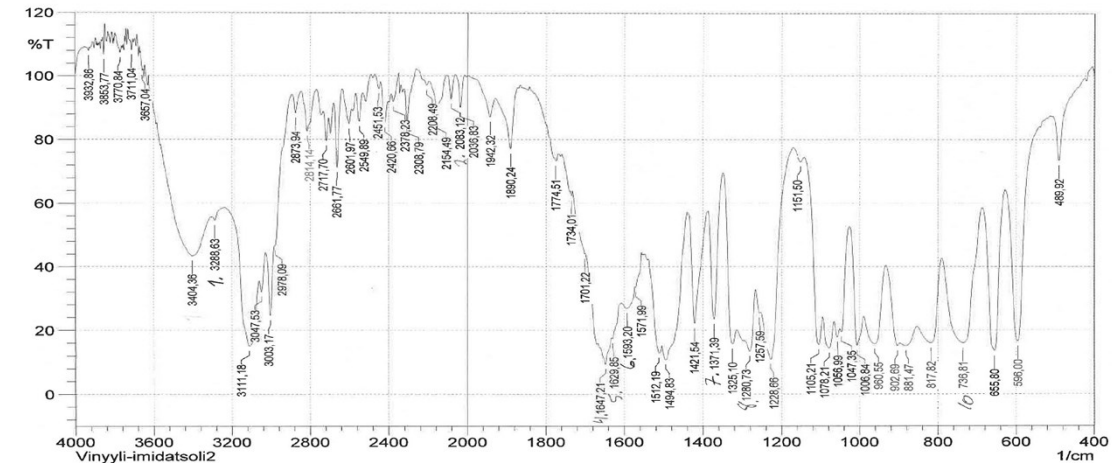

Comment: Vinyli-imidatsoli2  
No. of Scans: Resolution: Apodization:  
User: user Date/Time: 16.1.2019 10:49:35

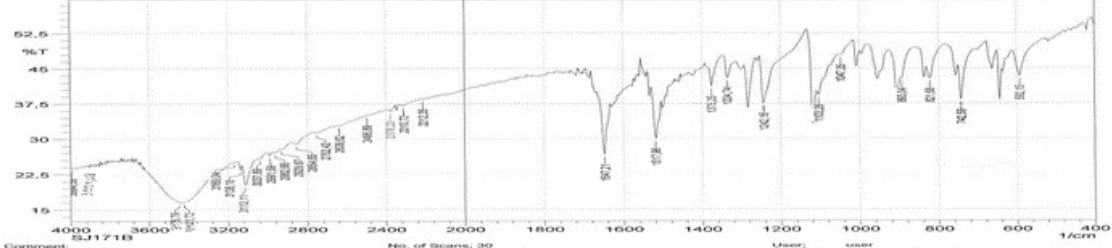

Comment: SJ171B  
No. of Scans: 30 Resolution: 4 [1/cm] Apodization: Happ-Genzel  
User: user Date/Time: 22.6.2019 9:37:10

C

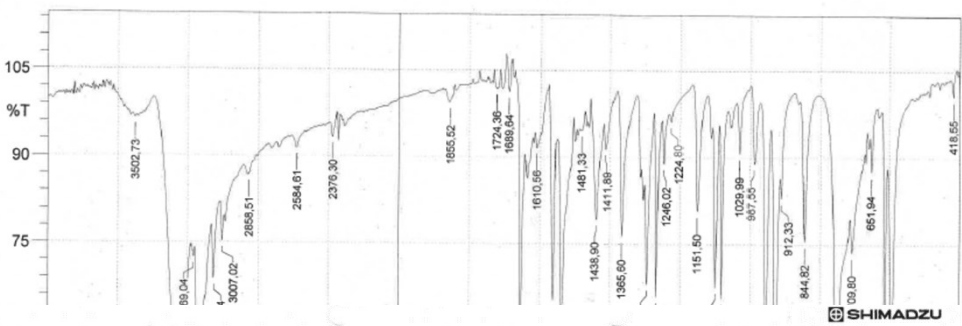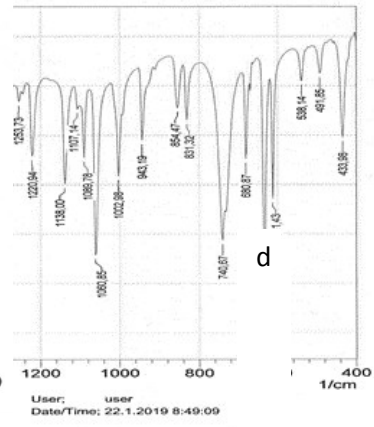

d

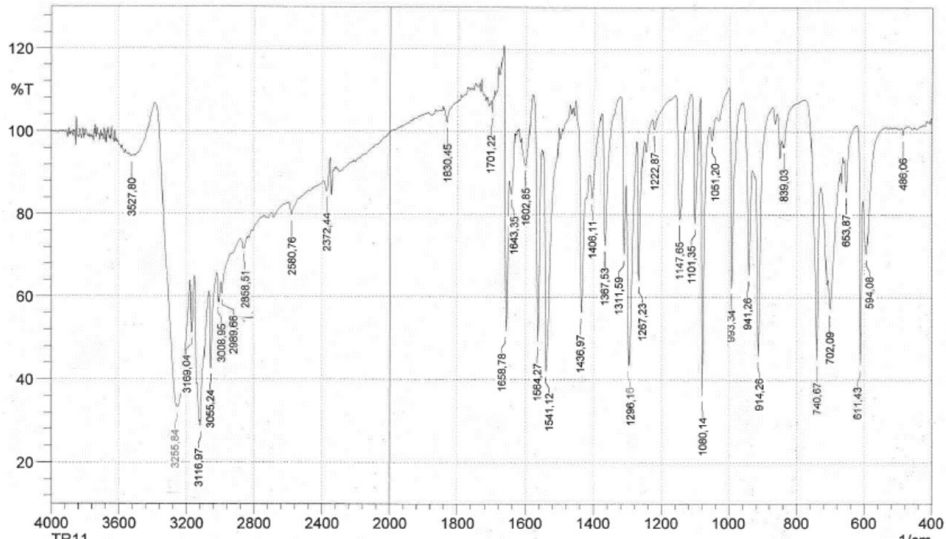

e

**Figure S6.** Experimental IR spectrum of

a Vinylimidazole

b  $[\text{PtCl}_3(\text{Hvinylimidazole})]$  (1)  $\nu(\text{N-H})$  3281,  $\nu(\text{C=C, vinyl})$  1437  $\text{cm}^{-1}$ .

c  $[\text{Au}(\text{vinylimidazole})_2]^+[\text{AuBr}_2]^-$  (2)  $\nu(\text{C=C, vinyl})$  1640  $\text{cm}^{-1}$ .

d  $[\text{Hvinylimidazole}]^+[\text{AuCl}_4]^-$  (3)  $\nu(\text{N-H})$  3254,  $\nu(\text{C=C})$  1640  $\text{cm}^{-1}$ .

e  $[\text{Hvinylimidazole}]^+[\text{AuBr}_4]^-$  (4)  $\nu(\text{N-H})$  3256,  $\nu(\text{C=C})$  1640  $\text{cm}^{-1}$ .

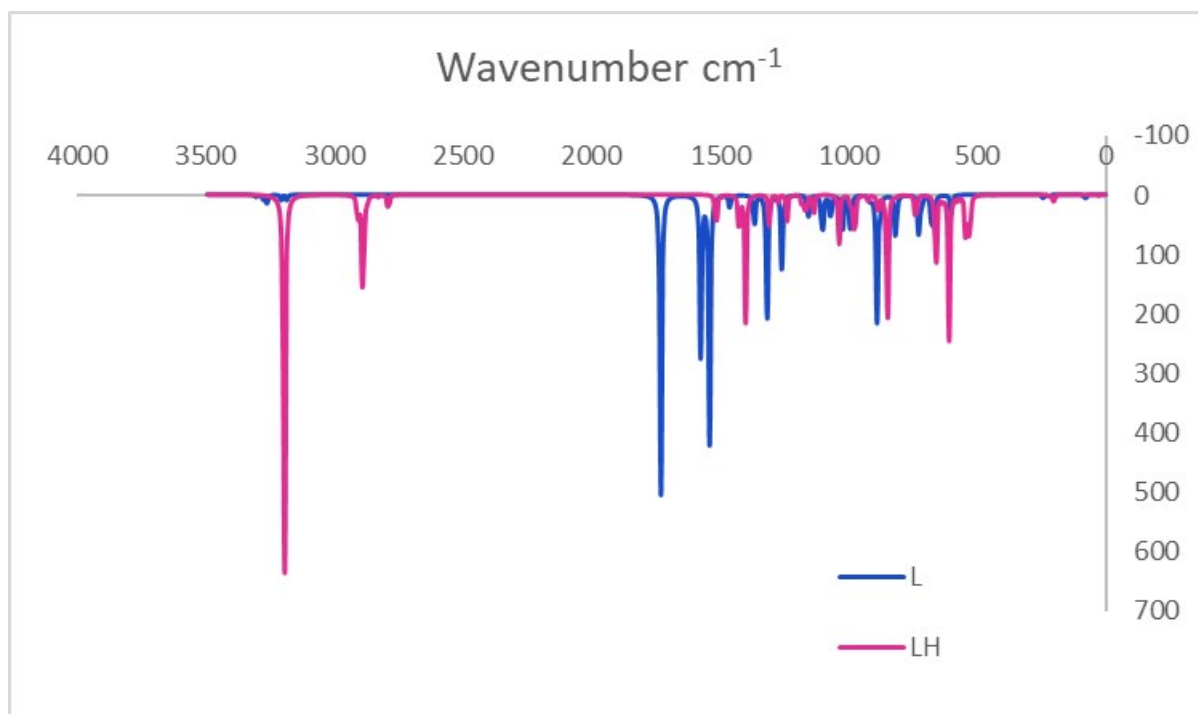

|                   | LH   | L |
|-------------------|------|---|
| $\nu(\text{N-H})$ | 3431 |   |



|             |      |      |
|-------------|------|------|
| vC_Hring    | 3102 | 3062 |
| v(C=C)vinyI | 1624 | 1626 |
| v(C-H)vinyI |      | 3080 |

**Figure S7.** Simulated IR spectrum of vinylimidazole and protonated vinylimidazole.

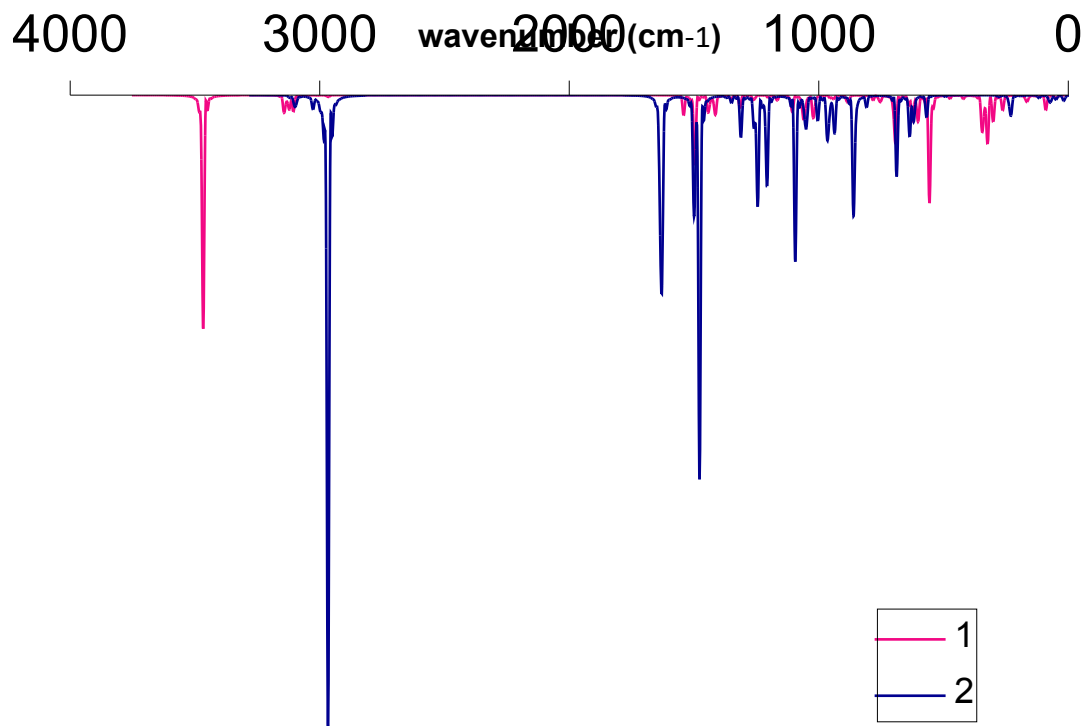

|             | <b>1</b> | <b>2</b> |
|-------------|----------|----------|
| v(N-H)      | 3468     |          |
| vC_Hring    | 3141     | 2967     |
| v(C=C)vinyI | 1441     | 1632     |
| v(C-H)vinyI | 3055     | 3083     |

**Figure S8.** Simulated IR spectra of optimized structures of [PtCl<sub>3</sub>(Hvinylimidazole)] (1) and [Au(vinylimidazole)<sub>2</sub>]<sup>+</sup>[AuBr<sub>2</sub>]<sup>-</sup> (2).

**Table S2.** Bond length and angle data for 1-4Selected bond lengths [ $\text{\AA}$ ] and angles [ $^\circ$ ] for **1**

---

|                   |             |
|-------------------|-------------|
| C(2)-N(3)         | 1.322(2)    |
| C(2)-N(1)         | 1.336(2)    |
| C(4)-C(5)         | 1.351(2)    |
| C(4)-N(3)         | 1.371(2)    |
| C(5)-N(1)         | 1.385(2)    |
| C(6)-C(7)         | 1.395(2)    |
| C(6)-N(1)         | 1.420(2)    |
| C(6)-Pt(1)        | 2.1358(17)  |
| C(7)-Pt(1)        | 2.1092(17)  |
| Cl(1)-Pt(1)       | 2.3056(5)   |
| Cl(2)-Pt(1)       | 2.2972(5)   |
| Cl(3)-Pt(1)       | 2.2922(5)   |
|                   |             |
| N(3)-C(2)-N(1)    | 108.03(15)  |
| C(5)-C(4)-N(3)    | 106.98(16)  |
| C(4)-C(5)-N(1)    | 106.74(15)  |
| C(7)-C(6)-N(1)    | 122.77(15)  |
| C(7)-C(6)-Pt(1)   | 69.79(10)   |
| N(1)-C(6)-Pt(1)   | 115.11(11)  |
| C(6)-C(7)-Pt(1)   | 71.86(10)   |
| C(2)-N(1)-C(5)    | 108.62(14)  |
| C(2)-N(1)-C(6)    | 127.33(15)  |
| C(5)-N(1)-C(6)    | 124.02(14)  |
| C(2)-N(3)-C(4)    | 109.62(14)  |
| C(7)-Pt(1)-C(6)   | 38.35(7)    |
| C(7)-Pt(1)-Cl(3)  | 88.65(5)    |
| C(6)-Pt(1)-Cl(3)  | 93.70(4)    |
| C(7)-Pt(1)-Cl(2)  | 90.79(5)    |
| C(6)-Pt(1)-Cl(2)  | 87.02(4)    |
| Cl(3)-Pt(1)-Cl(2) | 178.052(17) |

|                   |            |
|-------------------|------------|
| C(7)-Pt(1)-Cl(1)  | 160.92(5)  |
| C(6)-Pt(1)-Cl(1)  | 160.51(5)  |
| Cl(3)-Pt(1)-Cl(1) | 90.815(19) |
| Cl(2)-Pt(1)-Cl(1) | 89.096(19) |

Bond lengths [Å] and angles [°] for **2**

---

|             |           |
|-------------|-----------|
| C(2)-N(3)   | 1.304(8)  |
| C(2)-N(1)   | 1.360(8)  |
| C(2A)-N(3A) | 1.309(8)  |
| C(2A)-N(1A) | 1.358(8)  |
| C(4)-C(5)   | 1.357(9)  |
| C(4)-N(3)   | 1.373(9)  |
| C(4A)-C(5A) | 1.369(9)  |
| C(4A)-N(3A) | 1.373(8)  |
| C(5)-N(1)   | 1.371(8)  |
| C(5A)-N(1A) | 1.369(9)  |
| C(6)-C(7)   | 1.306(10) |
| C(6)-N(1)   | 1.415(8)  |
| C(6A)-C(7A) | 1.300(10) |
| C(6A)-N(1A) | 1.414(8)  |
| N(3)-Au(1)  | 2.017(5)  |
| N(3A)-Au(1) | 2.018(5)  |
| Br(1)-Au(2) | 2.3826(9) |
| Br(2)-Au(2) | 2.3843(9) |
| Au(1)-Au(2) | 3.1200(5) |

|                   |          |
|-------------------|----------|
| N(3)-C(2)-N(1)    | 109.6(5) |
| N(3A)-C(2A)-N(1A) | 110.5(6) |
| C(5)-C(4)-N(3)    | 109.3(6) |
| C(5A)-C(4A)-N(3A) | 107.6(5) |
| C(4)-C(5)-N(1)    | 105.5(6) |
| N(1A)-C(5A)-C(4A) | 107.4(6) |
| C(7)-C(6)-N(1)    | 125.1(7) |
| C(7A)-C(6A)-N(1A) | 124.3(7) |
| C(2)-N(1)-C(5)    | 108.2(5) |
| C(2)-N(1)-C(6)    | 124.5(6) |
| C(5)-N(1)-C(6)    | 127.3(6) |
| C(2A)-N(1A)-C(5A) | 106.7(5) |
| C(2A)-N(1A)-C(6A) | 123.8(6) |
| C(5A)-N(1A)-C(6A) | 129.4(6) |
| C(2)-N(3)-C(4)    | 107.4(5) |
| C(2)-N(3)-Au(1)   | 125.4(5) |
| C(4)-N(3)-Au(1)   | 127.1(4) |

|                   |           |
|-------------------|-----------|
| C(2A)-N(3A)-C(4A) | 107.8(5)  |
| C(2A)-N(3A)-Au(1) | 126.3(5)  |
| C(4A)-N(3A)-Au(1) | 125.8(4)  |
| N(3)-Au(1)-N(3A)  | 176.1(2)  |
| N(3)-Au(1)-Au(2)  | 91.01(16) |
| N(3A)-Au(1)-Au(2) | 90.82(16) |
| Br(1)-Au(2)-Br(2) | 177.81(3) |
| Br(1)-Au(2)-Au(1) | 93.20(2)  |
| Br(2)-Au(2)-Au(1) | 88.98(2)  |

---

Symmetry transformations used to generate equivalent atoms:

Bond lengths [Å] and angles [°] for

---

|             |           |
|-------------|-----------|
| C(6)-C(7)   | 1.302(5)  |
| C(6)-N(1)   | 1.427(4)  |
| C(2)-N(3)   | 1.313(4)  |
| C(2)-N(1)   | 1.321(4)  |
| C(4)-C(5)   | 1.326(6)  |
| C(4)-N(3)   | 1.379(5)  |
| C(5)-N(1)   | 1.378(4)  |
| C(6A)-C(7A) | 1.257(17) |
| C(6A)-N(1A) | 1.426(15) |
| C(2A)-N(1A) | 1.327(8)  |
| C(2A)-N(3A) | 1.338(9)  |
| N(1A)-C(5A) | 1.358(9)  |
| C(5A)-C(4A) | 1.350(7)  |
| C(4A)-N(3A) | 1.352(10) |
| Cl(1)-Au(1) | 2.2789(4) |
| Cl(4)-Au(2) | 2.2798(5) |
| Cl(3)-Au(2) | 2.2763(5) |
| Cl(2)-Au(1) | 2.2738(5) |

|                   |           |
|-------------------|-----------|
| C(7)-C(6)-N(1)    | 123.8(3)  |
| N(3)-C(2)-N(1)    | 108.4(3)  |
| C(5)-C(4)-N(3)    | 106.3(5)  |
| C(4)-C(5)-N(1)    | 107.9(5)  |
| C(2)-N(1)-C(5)    | 108.1(4)  |
| C(2)-N(1)-C(6)    | 124.0(3)  |
| C(5)-N(1)-C(6)    | 127.8(4)  |
| C(2)-N(3)-C(4)    | 109.3(5)  |
| C(7A)-C(6A)-N(1A) | 126.0(10) |
| N(1A)-C(2A)-N(3A) | 108.4(14) |
| C(2A)-N(1A)-C(5A) | 109.0(13) |
| C(2A)-N(1A)-C(6A) | 123.9(10) |

|                       |            |
|-----------------------|------------|
| C(5A)-N(1A)-C(6A)     | 127.1(12)  |
| C(4A)-C(5A)-N(1A)     | 106.2(17)  |
| C(5A)-C(4A)-N(3A)     | 109(2)     |
| C(2A)-N(3A)-C(4A)     | 107.3(18)  |
| Cl(2)#1-Au(1)-Cl(1)   | 90.087(19) |
| Cl(2)-Au(1)-Cl(1)     | 89.913(19) |
| Cl(2)#1-Au(1)-Cl(1)#1 | 89.913(19) |
| Cl(2)-Au(1)-Cl(1)#1   | 90.087(19) |
| Cl(3)#2-Au(2)-Cl(4)   | 90.400(18) |
| Cl(3)-Au(2)-Cl(4)     | 89.600(18) |
| Cl(3)#2-Au(2)-Cl(4)#2 | 89.600(18) |
| Cl(3)-Au(2)-Cl(4)#2   | 90.400(18) |

---

Symmetry transformations used to generate equivalent atoms:

#1 -x,-y,-z #2 -x,-y-1,-z

Bond lengths [Å] and angles [°] for **4**

---

|                       |             |
|-----------------------|-------------|
| C(2)-N(3)             | 1.311(4)    |
| C(2)-N(1)             | 1.336(3)    |
| C(4)-C(5)             | 1.338(4)    |
| C(4)-N(3)             | 1.372(4)    |
| C(5)-N(1)             | 1.382(3)    |
| C(6)-C(7)             | 1.291(4)    |
| C(6)-N(1)             | 1.419(3)    |
| Br(1)-Au(1)           | 2.4260(2)   |
| Br(2)-Au(1)           | 2.4236(2)   |
| Br(3)-Au(2)           | 2.4286(2)   |
| Br(4)-Au(2)           | 2.4227(2)   |
|                       |             |
| N(3)-C(2)-N(1)        | 107.8(2)    |
| C(5)-C(4)-N(3)        | 106.1(2)    |
| C(4)-C(5)-N(1)        | 107.6(2)    |
| C(7)-C(6)-N(1)        | 124.4(3)    |
| C(2)-N(1)-C(5)        | 108.1(2)    |
| C(2)-N(1)-C(6)        | 124.3(2)    |
| C(5)-N(1)-C(6)        | 127.6(2)    |
| C(2)-N(3)-C(4)        | 110.3(2)    |
|                       |             |
| Br(2)-Au(1)-Br(2)#1   | 180.000(12) |
| Br(2)-Au(1)-Br(1)#1   | 90.260(8)   |
| Br(2)#1-Au(1)-Br(1)#1 | 89.739(8)   |
| Br(2)-Au(1)-Br(1)     | 89.740(8)   |
| Br(2)#1-Au(1)-Br(1)   | 90.260(8)   |
| Br(1)#1-Au(1)-Br(1)   | 180.0       |
| Br(4)-Au(2)-Br(4)#2   | 180.0       |
| Br(4)-Au(2)-Br(3)#2   | 90.289(8)   |
| Br(4)#2-Au(2)-Br(3)#2 | 89.711(8)   |
| Br(4)-Au(2)-Br(3)     | 89.711(8)   |
| Br(4)#2-Au(2)-Br(3)   | 90.288(8)   |
| Br(3)#2-Au(2)-Br(3)   | 180.0       |

---

Symmetry transformations used to generate equivalent atoms:

#1 -x+2,-y,-z #2 -x+1,-y,-z+1
